# Supplementary material
Source: ML conference proceedings conference paper supplement (https://openreview.net/forum?id=7qIGNFpf1C)
Supplement: supplementary_material [file Agent_Model_OpenAI.pdf › AI Agents for Science 2025/Agent_Model_OpenAI.pdf]

🔍 Search for articles...

---

All Collections > ChatGPT > ChatGPT agent

# ChatGPT agent

Learn about the features of ChatGPT agent mode and how to get started

Updated: 6 days ago

Looking to contact OpenAI support? Please visit here: [How can I contact support?](#)

## Overview

ChatGPT agent helps you accomplish complex online tasks by reasoning, researching, and taking actions on your behalf. It can navigate websites, work with uploaded files, connect to third-party data sources (like email and document repositories), fill out forms, and edit spreadsheets—while ensuring you remain in control.

ChatGPT agent can use a range of tools to complete tasks, including:

- Visual browser for interacting with websites
- Code interpreter for running code and analyzing data
- Connectors for accessing read-only data sources
- Terminal for executing supported commands

Tasks usually complete within **5–30 minutes**, depending on complexity.

## Getting started

To start using agent mode, select it from the tools menu or type `/agent` in the composer. Describe the task you want completed, and the agent will begin executing it. It will pause for clarification or confirmation when needed. Agent mode does not require technical skills, and can be guided or interrupted mid-task, making it accessible to many users and adaptable to changing needs.

## Availability by plan

Agent mode is currently available on **Pro**, **Plus**, **Business**, **Enterprise**, and **Edu** plans for users in all of our [supported countries and territories](#).

## Usage & limits

Agent mode includes the following monthly message limits:

- **Plus:** 40 messages/month
- **Pro:** 400 messages/month
- **Business & Enterprise:** 40 messages/month
- **Business & Enterprise plans using [flexible pricing](#):** 30 credits/message

Only initial user-initiated agent requests count toward the limit. Intermediate clarifications or authentication steps are not counted against the usage limit. ChatGPT agent use is subject to reasonable rate limits (such as limits on the number of concurrent tasks) in order to ensure the product works well for all users.

## Connectors

ChatGPT agent can use [connectors](#) as additional, read-only data sources to leverage when conducting research. Given connectors are read-only, ChatGPT agent will use other tools like its virtual browser to take actions on the web. You should use extra caution when using connectors with ChatGPT agent to prevent unauthorized access to sensitive information.

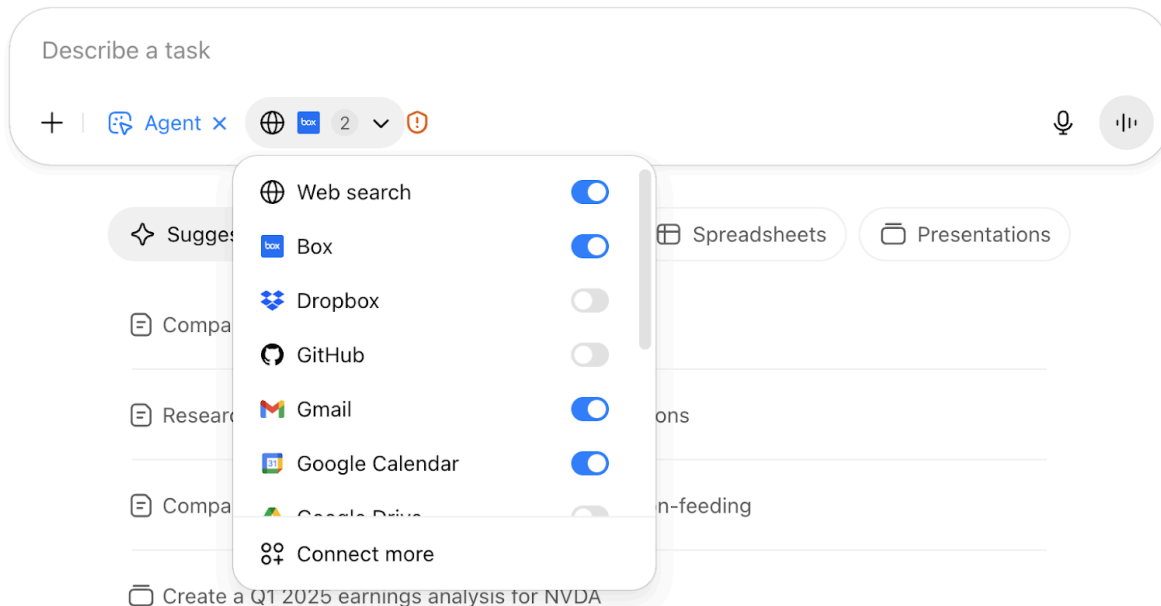

## Task scheduling & management

After a task finishes, you can set it to repeat daily, weekly, or monthly by clicking the **Clock icon**. All recurring tasks can be reviewed and managed at [chatgpt.com/schedules](https://chatgpt.com/schedules).

To edit or manage tasks:

- Click “...” → **Edit schedule** in the top-right corner of a conversation.
- Use the **Clock icon** on specific messages.
- Visit [chatgpt.com/schedules](https://chatgpt.com/schedules) to review, edit, pause, or delete tasks.

## Safety & privacy

When you sign ChatGPT agent into websites or enable connectors, it can access sensitive data like emails, files, or account settings, and perform actions on your behalf (e.g., sharing files, modifying account settings). This creates potential privacy risks, including “prompt injection” attacks.

ChatGPT agent incorporates multiple safeguards, including user confirmations for high-impact actions, refusal patterns for disallowed tasks, prompt injection monitoring, and a “watch mode” requiring user supervision on certain sites. These measures are designed to help prevent harmful or unintended outcomes. However, these measures don’t eliminate all risks. It remains important to monitor ChatGPT agent and exercise care when using it.

## Prompt injection example

For example, you might ask the agent to find a restaurant for a group dinner by checking your calendar and recent emails. While researching, it might encounter a malicious comment—essentially a harmful piece of content designed to trick the agent into performing unintended actions—directing it to retrieve a password reset code from Gmail and send it to a malicious website.

ChatGPT agent includes extensive multi-layered safeguards designed to help reduce risk, but you can exercise caution by disabling unnecessary connectors, avoiding sensitive logins, or logging out when done.

Learn more about prompt injection safeguards in the [ChatGPT agent system card](#).

## Best practices for data safety and reducing privacy risks

- Avoid typing passwords or private info directly in messages; use **takeover mode** for sensitive inputs.
- Enable only the connectors needed for the current task.
- Consider the data sensitivity of sites you log into via agent.
- Avoid vague, open-ended prompts like “Check my email and handle everything.”
- Stop tasks immediately if something seems suspicious.
- Clear remote browser data after sensitive sessions.
- Regularly review and manage connector permissions in your settings.

## Sensitive data & logins

If a task requires a login, ChatGPT agent will pause and prompt you to take control of the virtual browser (“...” → **Take over browser**). While you control the browser, no screenshots are captured. This enhances privacy for passwords and other data entered by the user. Once you have finished the step ChatGPT agent has prompted you to complete, you can return control to ChatGPT agent. It will then seamlessly resume its automated workflow from where it left off.

Cookies persist across sessions for convenience, just like a regular browser.

To clear saved logins or cookies, sign out of sites and remove cookies in your **ChatGPT data control settings**.

## Data handling and taking of screenshots

ChatGPT agent uses screenshots of its virtual browser window to “see” and interact with web pages. This allows it to click buttons, fill out forms, and navigate websites. Screenshots also help ChatGPT agent reason about what actions to take and adjust its behavior if it encounters challenges or errors during a task.

Screenshots capture the window in the virtual browser where the task is active.

When you’re controlling the browser, ChatGPT doesn’t capture passwords or sensitive data you manually enter.

Chats, agent browsing history, and screenshots remain in your conversation history until you delete them. [Deleting a chat](#) also deletes any associated screenshots.

## Do humans review my ChatGPT agent content?

Your ChatGPT agent content (including screenshots) may be accessed by a limited number of authorized OpenAI personnel, as well as trusted service providers that are subject to confidentiality and security obligations in order to: (1) investigate abuse or a security incident; (2) provide support to you if you reach out to us with questions about your account; (3) handle legal matters; or (4) improve model performance (unless you have opted out). Access to content is subject to technical access controls and limited only to authorized personnel on a need-to-know basis. Additionally, we monitor and log all access to user content and authorized personnel must undergo security and privacy training prior to accessing any user content.

## Business, Enterprise, and Edu plans

By default, we do not use your business data for training our models, including data accessed during agent mode sessions.

## Plus and Pro users

For Pro and Plus users, your data, including screenshots for the visual browser, is used in accordance with OpenAI's [privacy policy](#), including to provide the service, maintain safety, and—if you've opted in—improve our models.

You have control over how long we retain your data in ChatGPT agent, and whether we use it to improve our models, which we also describe further below.

## How long are ChatGPT agent chats and screenshots retained?

Your chats in ChatGPT agent, browsing history in ChatGPT agent, and screenshots associated with those conversations, are retained until you delete them. Deleting a chat deletes the screenshots taken during that chat. Deleted chats and associated screenshots will be deleted from our systems within 90 days. You can learn more about how you can delete your data [here](#).

To turn off model training, go to **Settings → Data Controls** and disable “**Improve the model for everyone.**”

## Your training preferences

You can control whether your data is used to improve and train OpenAI's models. To do so, On ChatGPT's site, look for the Data Controls (or “Privacy” settings).

### How to turn off model training:

To turn off or disable model training, navigate to your profile icon on the top-right of the page and select > Settings > Data Controls, and disable “Improve the model for everyone”:

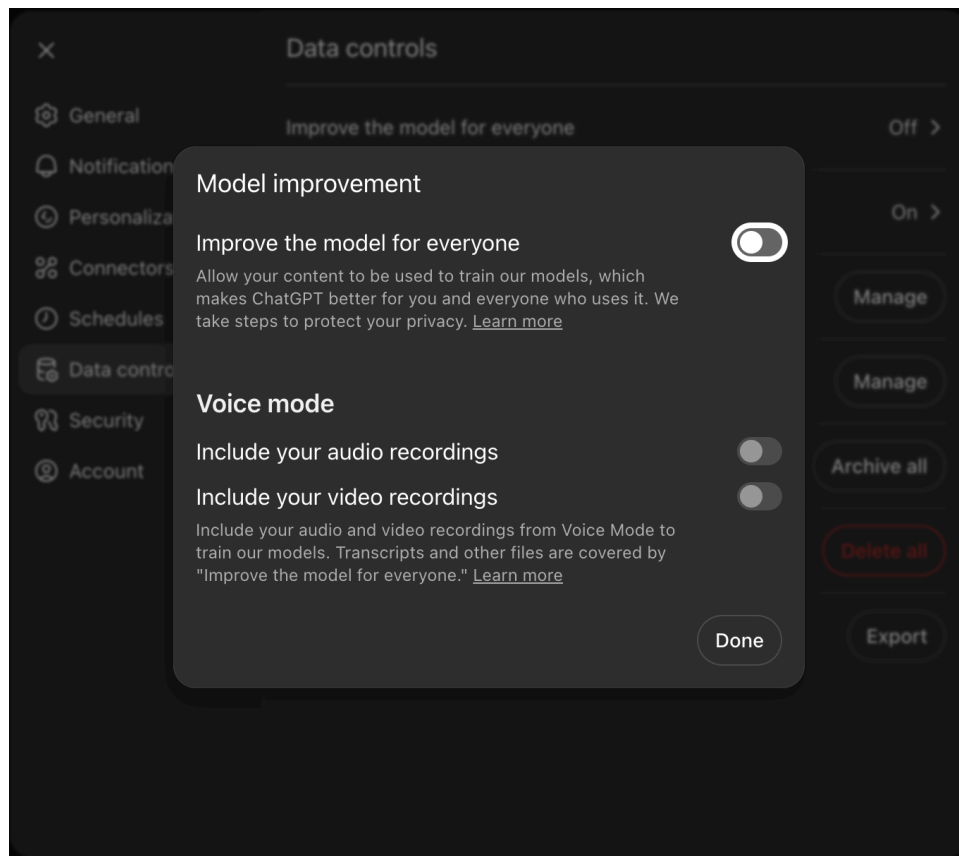

### Turn off "Improve the model for everyone"

When this setting is OFF, your new conversations (including screenshots) won't be used for training OpenAI models. (You may separately choose to delete prior chats and screenshots as described above.)

Please refer to this [article](#) to understand how content may be used to improve model performance.

## Website access restrictions

To maintain security, safety, and compliance, ChatGPT agent may not be able to visit certain websites. This blocklist applies across both the virtual browser and connectors. If an attempt is made to access a restricted site, the task will not proceed for that source.

## Workspace controls (Enterprise & Edu)

## Workspace toggle

Enterprise workspace owners will have a toggle to enable or disable agent mode for their workspace, defaulted to OFF.

## Role-based access controls (RBAC)

Workspace owners will be able to assign agent mode as available to specific roles. For more information about RBAC, please refer to our [documentation](#).

## Connector controls

Workspace owners can control which connectors are available, and agent mode will only have access to the connectors that have been enabled for the workspace. It will not be able to use any connectors that are disabled.

**Note:** Agent mode cannot access data from synced connectors (like Google Drive). However, if connectors such as Google Drive chat and deep research are enabled, it can still access the data that way.

## Compliance API

Conversations involving agent tasks will appear in Compliance API logs, but individual agent actions (such as virtual computer usage, connector requests, chain of thought) will not.

## Data residency & retention

Enterprise data residency and custom retention policies will be respected.

Agent mode is available for enterprises worldwide, including those with data residency in the EU.



## Analytics & reporting

Usage analytics for agent mode will be included in reporting dashboards in the near future, however will not be available upon launch.

## Website blocking

Workspace owners can request to block specific websites and domains from ChatGPT agent access. When a site is blocked, the agent will not visit it while browsing or taking actions. You can choose to block:

- Exact domains: For example, ``website.com`` or ``mail.website.com``
- Entire domains with all subdomains: For example, ``website.com`` will block ``website.com``, ``mail.website.com``, ``docs.website.com``, and all other subdomains.

If you would like a blocklist set up for your workspace, contact your OpenAI Account Director or Customer Success Manager.

If you do not have an account team, contact OpenAI Support. Include your workspace ID and the website(s) you want blocked.

## Allowing agent mode to access your website

If you want to ensure that ChatGPT agent mode can access your website, follow the allowlisting steps outlined in the [ChatGPT agent allowlisting](#) guide.

## Operator

Operator functionality is now integrated into ChatGPT agent mode. The Operator website is no longer accessible.

## FAQs

### Is it available on the Free plan?

Agent mode is currently only available for paid plans.

## Does ChatGPT agent cite sources?

Yes, outputs include source links or screenshots.

## Which devices can I use agent mode on?

Agent is supported on ChatGPT Web, mobile (iOS/Android), and desktop apps (MacOS/Windows).

---

## Related articles

ChatGPT agent - release notes

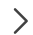

ChatGPT agent allowlisting

Allow ChatGPT agent traffic to reach your site securely and reliably

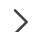

What is ChatGPT Enterprise?

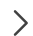

## Was this article helpful?

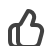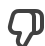

Additional feedback (optional)

Submit

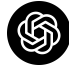

[ChatGPT](#)

[API](#)

[Service Status](#)

[Cookie Preferences](#)
