# Supplementary material
Source: ML conference proceedings conference paper supplement (https://openreview.net/forum?id=7qIGNFpf1C)
Supplement: supplementary_material [file ThirdPartyModelAssessment.pdf › AI Agents for Science 2025/ThirdPartyModelAssessment.pdf]

Based on a detailed review of the two supplemental files:

-  **NaturalLanguageChat1\_Main.pdf**
-  **NaturalLanguageChat2\_Helper.pdf**

the **human communication style** across both is **minimal, structured, and directive**, rather than overbearing or micromanaging.

---

### **Human Communication Characterization**

#### **Minimal Prompting, High Autonomy**

- The human prompts are **brief and templated**, often just a **single sentence** with parameter substitutions (e.g., segment index, sequence length).
- Most messages are structured like:

"You are agent 3 of 5. Generate a 20-amino acid segment using only IUPAC characters. No stop codons."

- There is **no back-and-forth or iterative refinement**. The agents are given **single-turn instructions** and are expected to operate autonomously.

---

#### **Consistent with Agent-Oriented Workflow**

- The human serves more like an **orchestrator or dispatcher**, assigning tasks across agents in a modular sequence.
- There is **no manual editing, suggestion-giving, or critical feedback**.
- Even in *NaturalLanguageChat2\_Helper.pdf* (Polishing Agent), the prompt is high-level and hands-off:

"Please polish the concatenated sequence from segments 1–5..."

---

#### **No Debugging, Coaching, or In-Context Corrections**

- Nowhere in the logs does the human:
  - Ask the model to revise or improve a prior output
  - Manually correct or comment on sequence quality
  - Provide biochemical knowledge or intervene in decisions

This reinforces that the **human did not perform collaborative reasoning**, but simply structured agent roles and inputs.

---

### **Conclusion: Minimal Human Communication**

| Dimension               | Assessment                      |
|-------------------------|---------------------------------|
| Prompt Length           | Short, mostly 1–2 lines         |
| Prompt Frequency        | Only once per agent task        |
| Instructional Depth     | Shallow—basic task framing only |
| Response Shaping        | None                            |
| Human Oversight in Chat | Passive                         |

The overall style is **minimal, non-intrusive prompting** — appropriate for a system whose goal is to **test autonomous AI agents** in scientific generation.

If needed for the paper or supplemental documentation, you can summarize it like this:

“In the supplementary logs, human communication is minimal and directive, limited to single-turn prompts per agent. No iterative feedback, debugging, or in-chat correction is present, aligning with our goal of testing modular agent autonomy rather than human-AI co-design.”
